# Supplementary material for: A CTAB-mediated antisolvent vapor route to shale-like Cs4PbBr6 microplates showing an eminent photoluminescence
Source: Royal Society of Chemistry journal article supplement (doi:10.1039/c9ra10987k), 2020-01-01
Supplement: c9ra10987k1.pdf [file c9ra10987k1.pdf]

## Supporting Information

### **A CTAB-Mediated Antisolvent Vapor Route to Shale-Like Cs<sub>4</sub>PbBr<sub>6</sub> Microplates Showing an Eminent Photoluminescence**

Yunwei Wei,<sup>a</sup> Wei Zheng,<sup>b</sup> Malik Zeeshan Shahid,<sup>a</sup> Zhixiang Jiang,<sup>b</sup> Yuehua Li,<sup>a</sup> Zhongyao Duan,<sup>a</sup> Guangning Liu,<sup>a</sup> Xun Hu,<sup>b</sup> Cuncheng Li<sup>\*a</sup>

<sup>a</sup> Collaborative Innovation Center for Green Chemical Manufacturing and Accurate Detection, Key Laboratory of Interfacial Reaction & Sensing Analysis in University of Shandong, School of Chemistry and Chemical Engineering, University of Jinan, Jinan 250022, Shandong, P. R. China

<sup>b</sup> School of Materials Science and Engineering, University of Jinan, Jinan 250022, Shandong, P. R. China

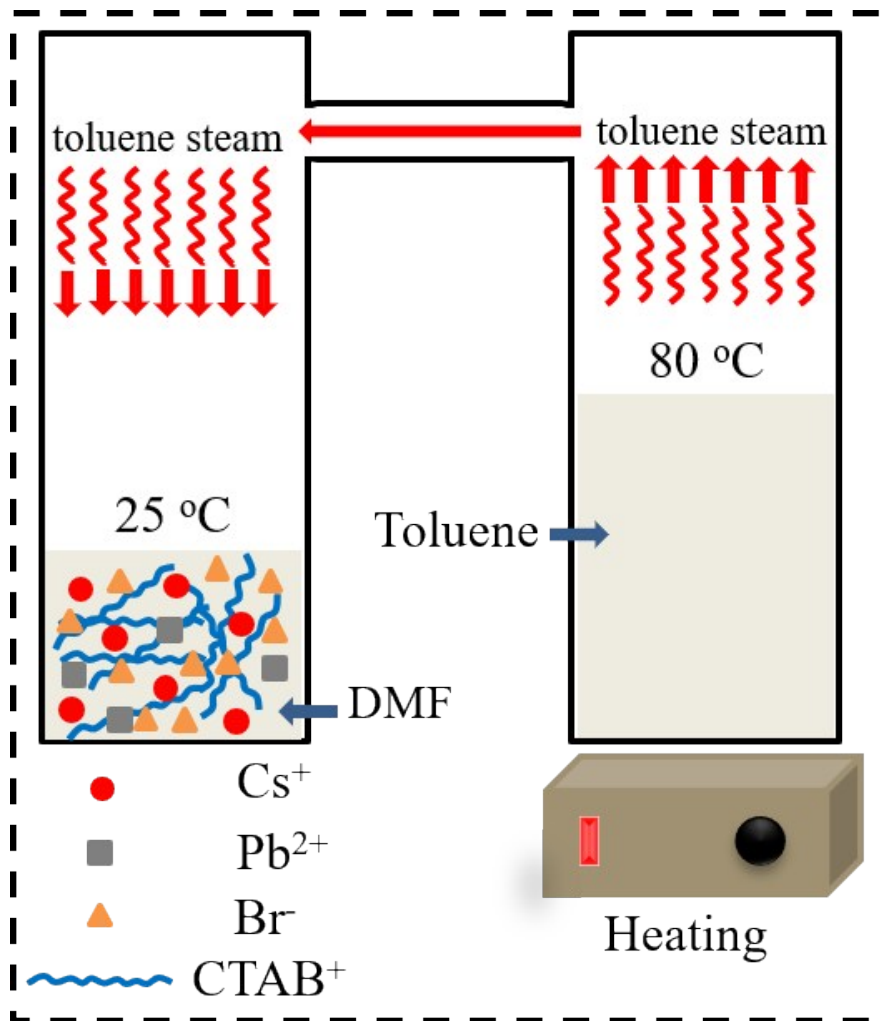

**Figure S1.** Schematic illustration for the synthesis process of shale-like Cs<sub>4</sub>PbBr<sub>6</sub> perovskite microplates.

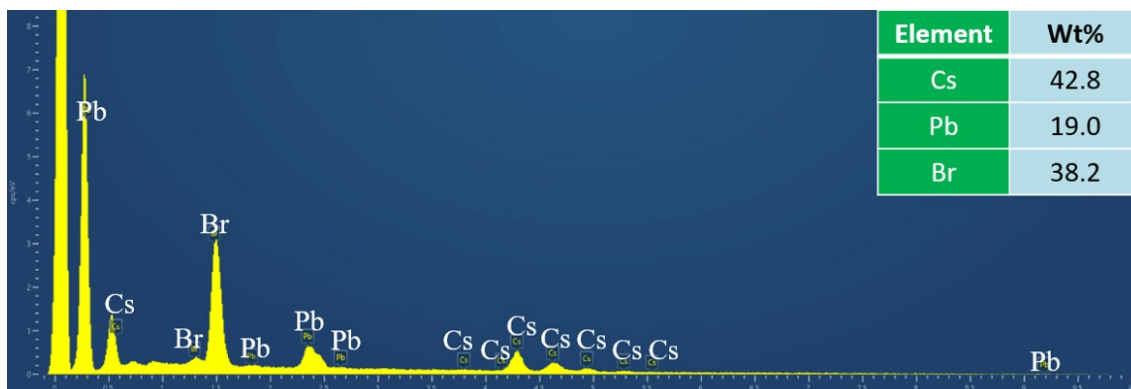

**Figure S2.** The corresponding EDS spectrum of the shale-like  $\text{Cs}_4\text{PbBr}_6$  perovskite microplates in Figure 1d.

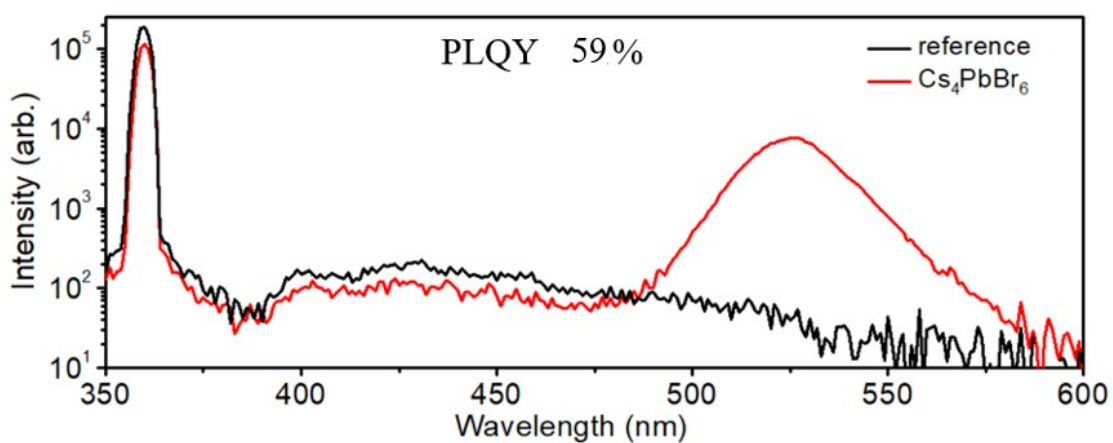

**Figure S3.** Photoluminescence quantum yield of the as-prepared shale-like  $\text{Cs}_4\text{PbBr}_6$  perovskite microplates. Black line: reference spectrum, red line:  $\text{Cs}_4\text{PbBr}_6$  perovskite microplates.

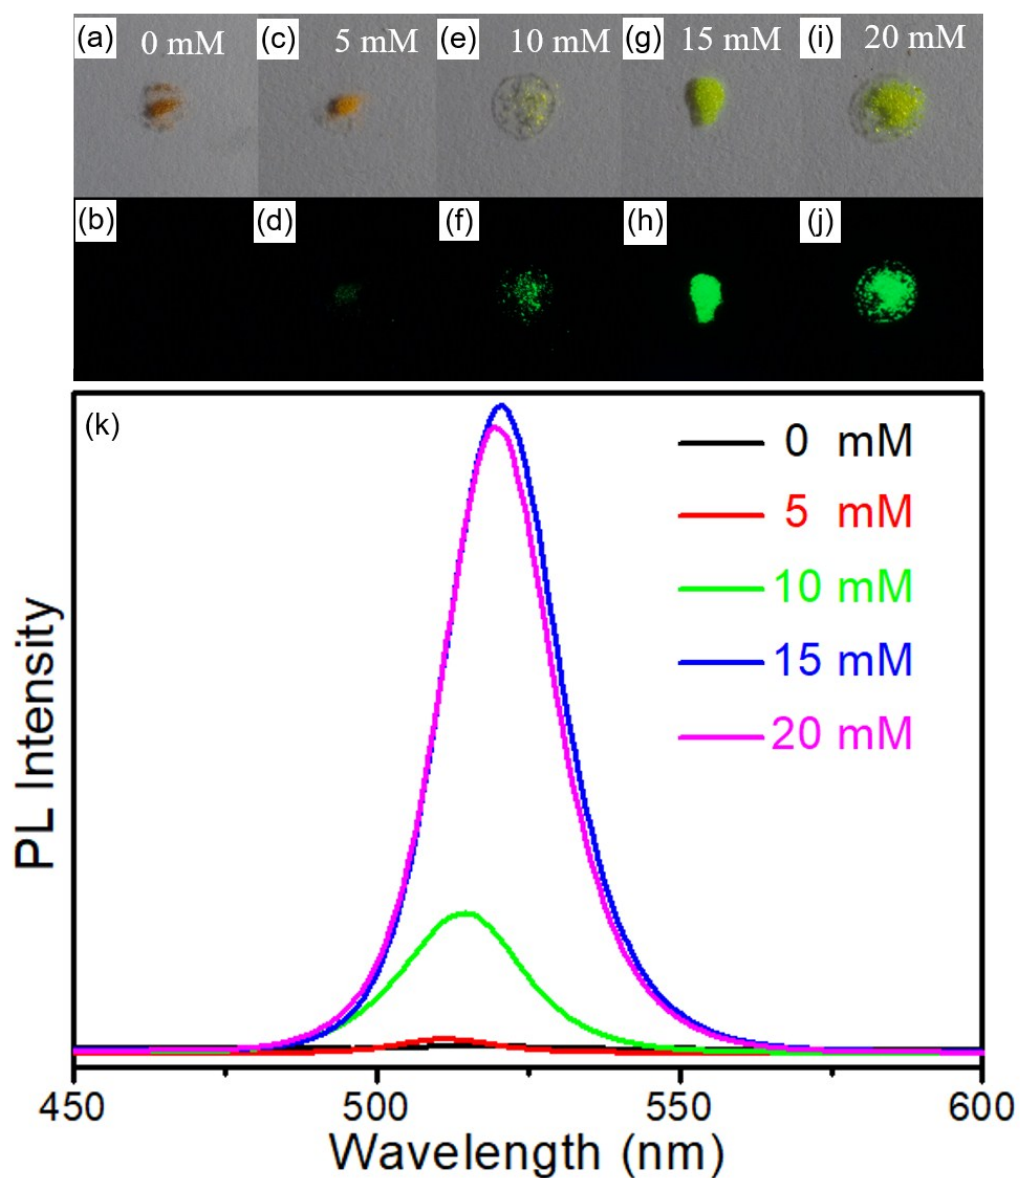

**Figure S4.** (a), (c), (e), (g), (i) optical microscope pictures under nature light, and (b), (d), (f), (h), (j) fluorescent pictures under 365 nm UV light and (k) PL emission spectra of the perovskite crystals with different concentrations of CTAB from 0 mM to 20 mM.

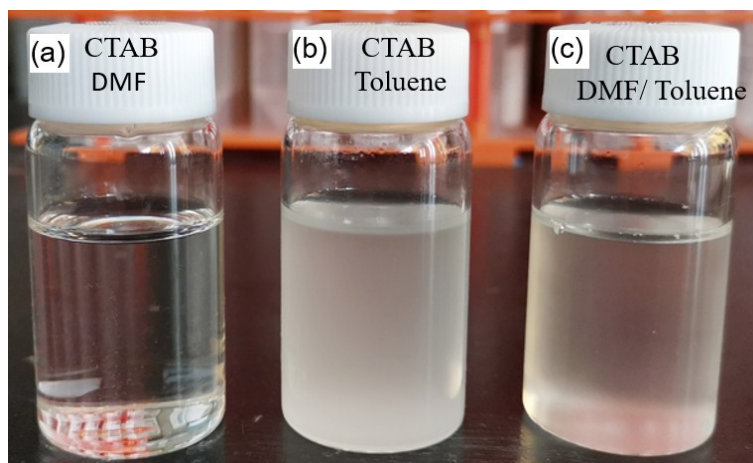

**Figure S5.** CTAB in (a) DMF, (b) toluene, and (c) the mixed solution of DMF and toluene with volume ratio 2:5.

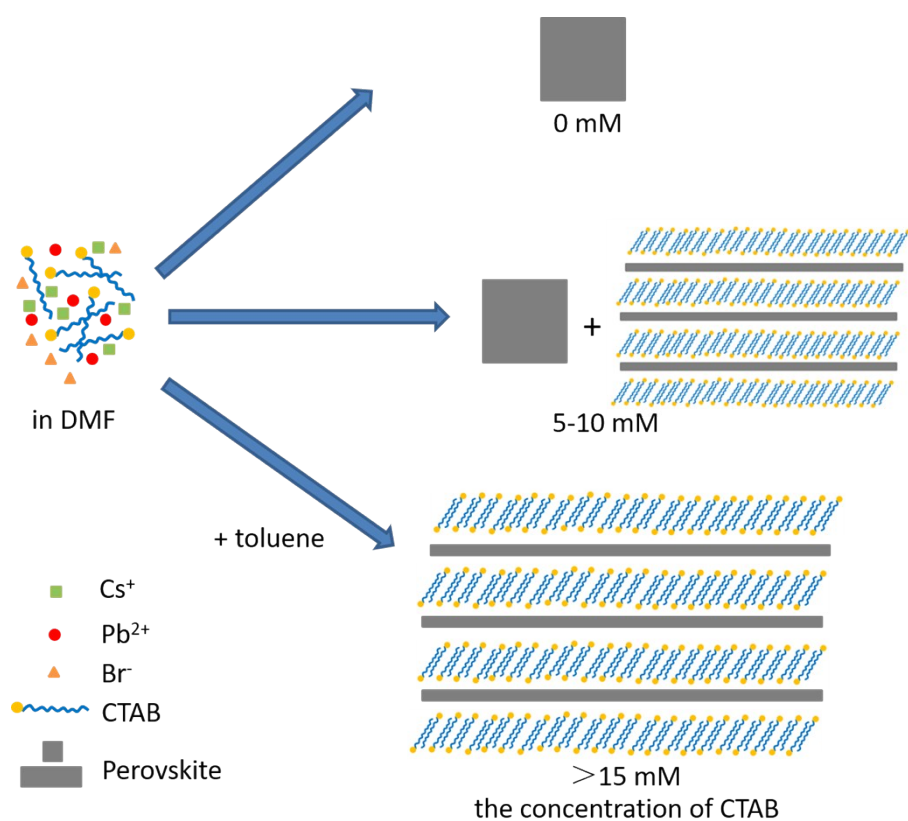

**Figure S6.** Schematic illustration for the morphologies of Cs<sub>4</sub>PbBr<sub>6</sub> perovskite-related materials obtained with CTAB of different concentrations.
